# Supplementary material
Source: publisher figshare collection journal article supplement (https://gsapubs.figshare.com/articles/dataset/_/17050340)
Supplement: Supplementary file 1 [file 1]

# Magma recharge patterns control eruption styles and magnitudes at Popocatepetl volcano (Mexico)

**Martin F. Mangler<sup>1,2</sup>, Chiara Maria Petrone<sup>2</sup>, and Julie Prytulak<sup>1</sup>**

<sup>1</sup> *Department of Earth Sciences, Durham University, Durham DH1 3LE, UK*

<sup>2</sup> *Department of Earth Science, The Natural History Museum, London SW7 5BD, UK*

## SUPPLEMENTAL MATERIALS

21 **Supplemental Material S1 – Full timescale dataset for eruptions of**  
 22 **Popocatépetl**

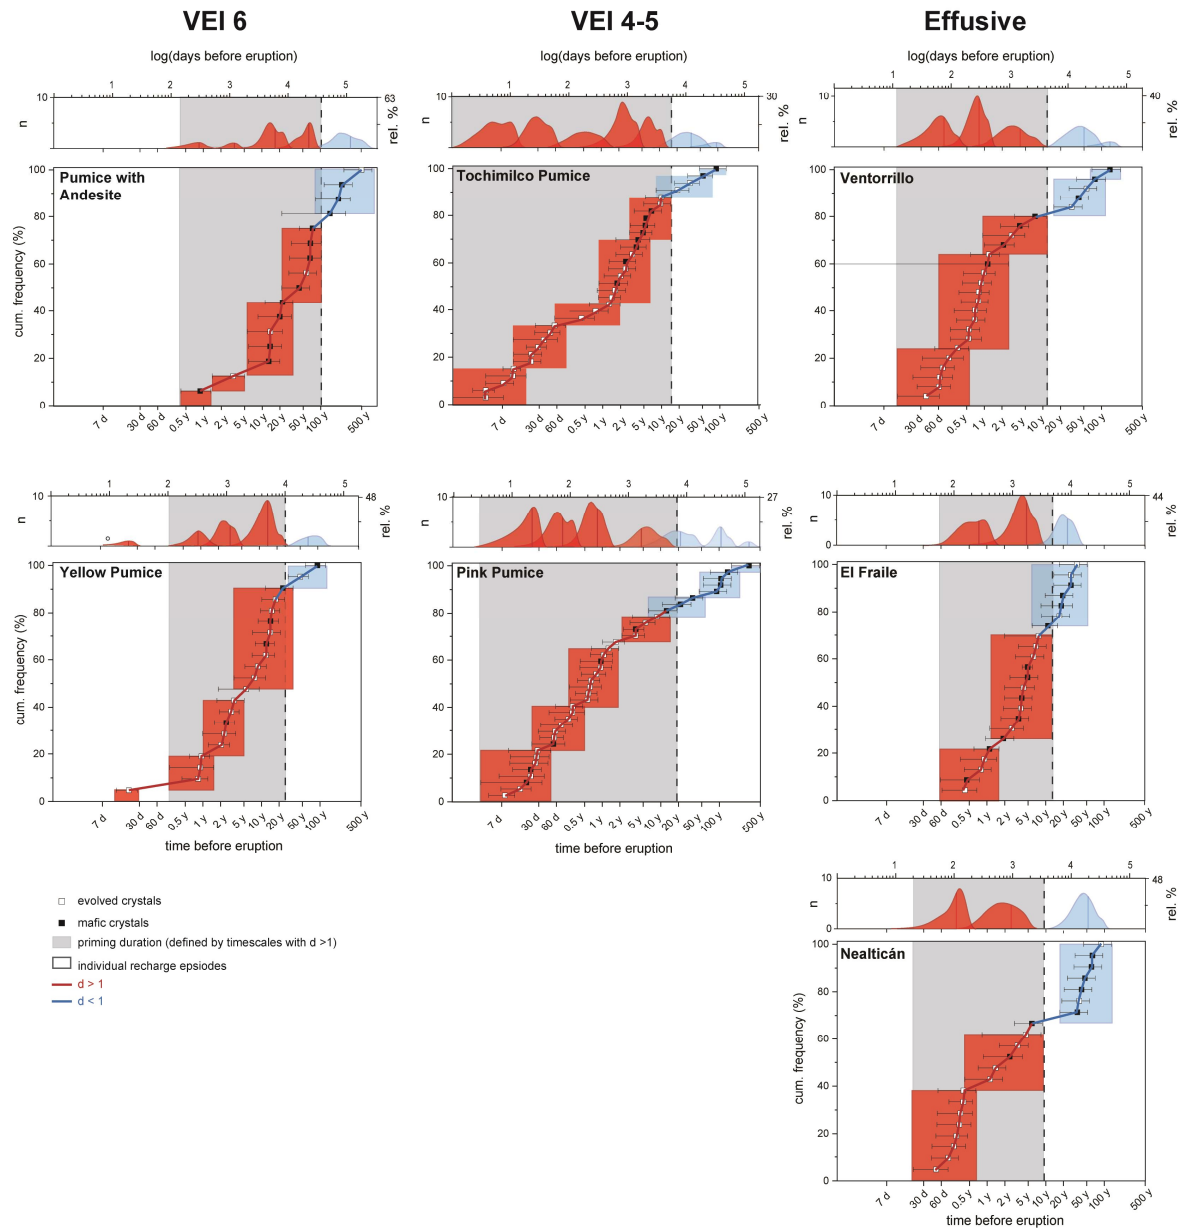

23 **Figure S1.1:** Cumulative frequency plots of Fe-Mg diffusion timescales  $\pm 1SD$  in orthopyroxene for  
 24 the seven studied eruptions of Popocatépetl (cf. Figure 2). Grey areas represent priming durations  
 25 defined by timescale densities  $d > 1$ . Boxes define individual recharge episodes defined by clusters of  
 26 timescales with overlapping uncertainties; data are clustered backwards, i.e., starting at the shortest  
 27 timescale. Recharge episodes forming part of the priming duration are colored red; those preceding  
 28 the priming period are colored blue. Upper panels show kernel density functions (KDFs) for each  
 29 episode and form the basis for Figure 3.

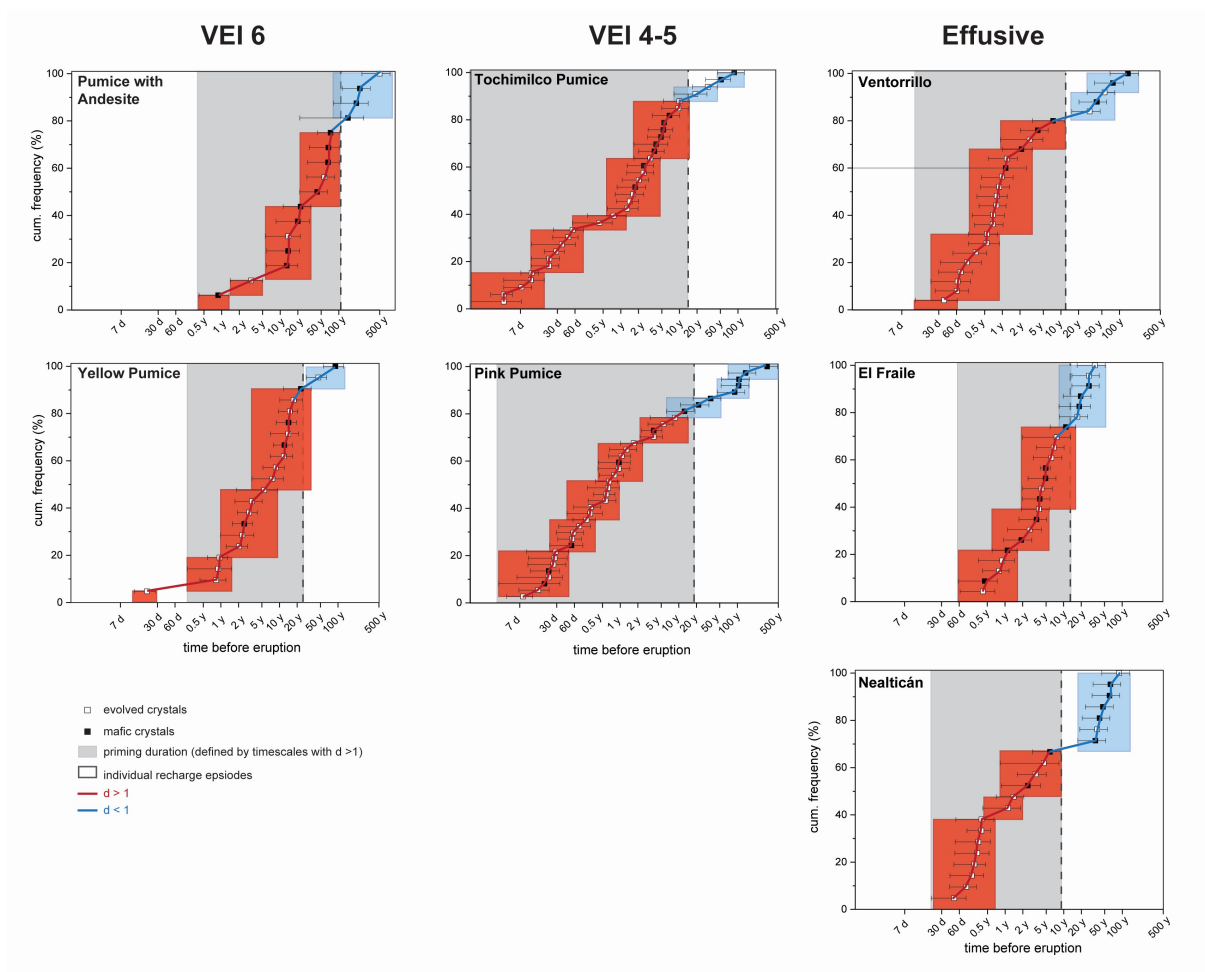

**Figure S1.2:** Cumulative frequency plots of Fe-Mg diffusion timescales  $\pm 1SD$  in orthopyroxene for the seven studied eruptions of Popocatepetl. Timescale data is forward clustered, i.e., starting at the longest timescales. The resulting number of recharge episodes for each eruption closely matches those derived from backward clustering (Figure S1.1).

**Table S1:** Fe-Mg diffusion data and timescale densities for orthopyroxenes from eruptions of Popocatepetl. - See separate Excel Sheet.

## **Supplemental Material S2 – Fe-Mg diffusion modeling of Popocatepetl orthopyroxene crystals**

### ***2.1 Crystal selection***

Orthopyroxene crystals in pumice samples were hand-picked from lightly crushed pyroclasts under a binocular microscope. No systematic variation of textures with crystal size was observed, therefore crystals were picked from the most abundant size fractions, i.e., 125–250  $\mu\text{m}$ , 250–500  $\mu\text{m}$ , and 500–1000  $\mu\text{m}$ . Orthopyroxene crystals in lavas were selected from thin sections directly as they tend to fracture when applying conventional mineral separation techniques. Samples were surveyed using an optical microscope and on the scanning electron microscope, and suitable crystals were selected according to the following criteria (see also Krimer and Costa, 2017):

- Crystal Sections: Crystal sections parallel to the c-axis were targeted to enable modeling along the a- or b-axes. The most accurate diffusion models are produced by ab-sections (Krimer and Costa, 2017), and we chose such crystals whenever possible; however such sections perpendicular to the c-axis are rare. Crystals with oblique sections or asymmetrical diffusion patterns were avoided.

- Textures: Well developed boundaries between compositional zones are required, ideally throughout the crystal, i.e., crystals with discontinuous or invasive boundaries were avoided.

- Boundary and initial conditions: Crystals need to show concentration plateaux on both sides of the compositional profile, and the transition may not be disturbed by growth or dissolution effects. Compositional profiles of trace elements with low diffusion rates (e.g., Al; Cherniak and Dimanov, 2010) were used to confirm initial conditions (i.e., the initial



shape of the profile), and to exclude interfering factors such as growth during differentiation or dissolution (Fig. S2.1).

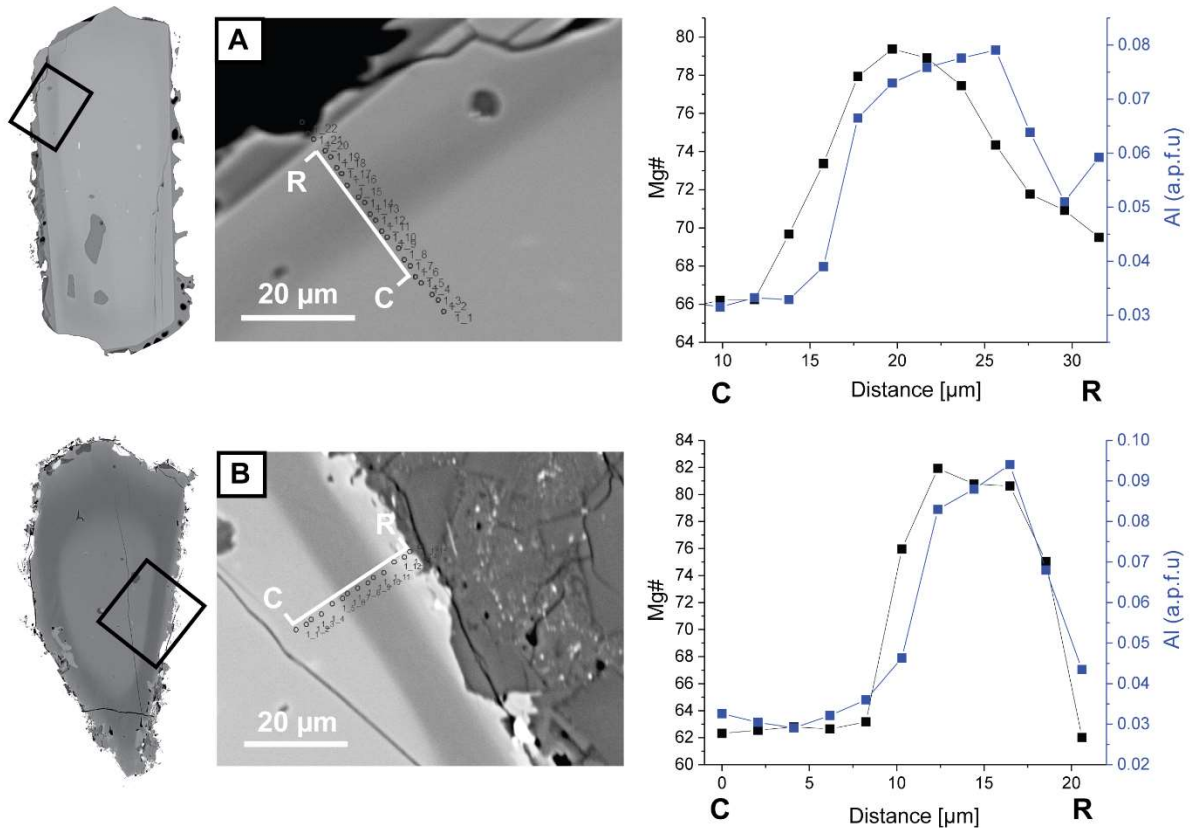

**Figure S2.1.** Backscattered electron (BSE) images and compositional transects acquired by electron probe microanalysis (EPMA) showing the variation of Mg# and Al concentrations across zoned orthopyroxene crystals. Aluminium is chosen due to its lower diffusion rate compared to Mg, which can be used to distinguish between growth/dissolution and diffusion, and to identify initial conditions. (A) Banded crystal with diffused Mg# profile. (B) Undiffused, banded crystal with well-defined profiles for Mg# and Al concentrations.

## 2.2 Compositional transects

High-resolution backscattered electron (BSE) images of zoned minerals were acquired at the Natural History Museum, London, on a FEI Quanta 650 ESEM field emission gun at 15 kV acceleration voltage, 15 mm working distance, a beam size of 3 – 3.5 and 10 – 30 µs dwell time.

Compositional profiles perpendicular to the c-axis were extracted from BSE greyscale images as they offer a superior spatial resolution (pixel spacing of  $<0.1\ \mu\text{m}$ ) compared to electron microprobe analysis ( $\sim 2\ \mu\text{m}$ ; Fig. S2,2). Grey values from BSE images are strongly correlated with the Mg# of orthopyroxene ( $R^2 = 0.9982$ ) and have been used routinely in previous diffusion modeling studies as a proxy for pyroxene compositions (e.g., Morgan et al., 2004; Allan et al., 2013; Chamberlain et al., 2014; Kilgour et al., 2014; Petrone et al., 2016). Extraction was performed using the greyvalues MATLAB script (Petrone et al., 2016), which calculates greyscales according to the nearest neighbour colour interpolation method. Each data point represents the average  $\pm 2\ \text{SE}$  of several hundreds of line measurements (e.g., 327 lines, blue in Fig. S2.2).

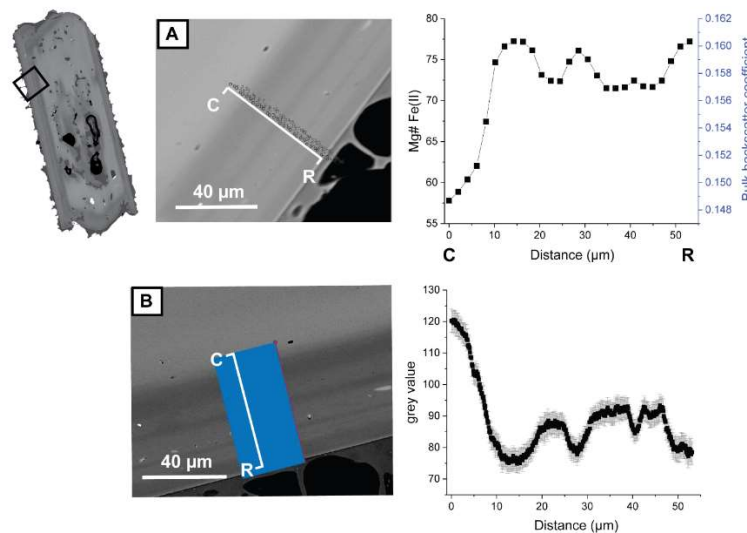

**Figure S2.2.** BSE images and compositional profiles of a multiply zoned orthopyroxene crystal. (A) Core – rim profile of Mg# acquired by EPMA. (B) Grey values extracted from high resolution BSE images along the same core – rim transect as in (A). The blue box represents the area the compositional transect is integrated from using the MATLAB script greyvalues (Petrone et al., 2016). Grey values show a strong negative correlation to Mg#, and extracted profiles offer a superior resolution compared to EPMA data

### 2.3 Diffusion coefficient

Diffusion timescales reported in this study were calculated using  $D_{Fe-Mg}^{opx}$  of Dohmen et al. (2016). Their expression requires temperature and oxygen fugacity as input parameters to calculate specific  $D$ s, but does not include a correction for pyroxene composition as they report negligible dependency of  $D_{Fe-Mg}^{opx}$  on composition of Fs <50. Temperatures were calculated individually for each compositional zone in modeled crystals following the method described in detail in Mangler et al. (2020). For the oxygen fugacity, we used 14 touching ilmenite-magnetite pairs in the Yellow Pumice, Pink Pumice and Nealticán lava satisfying Bacon and Hirschmann (1988)'s equilibrium conditions (Table S2; see separate Excel Sheet). The average oxygen fugacity calculated after Ghiorso and Evans (2008) is  $\Delta NNO = 0.7$  ( $f_{O_2} = 10^{-9.730}$ ), in agreement with previous estimates for Popocatepetl, ranging from  $\Delta NNO = 0 - 1.5$  (Schaaf et al., 2005; Witter et al., 2005; Atlas et al., 2006; Sosa-Ceballos et al., 2014). Dohmen et al. (2016) suggest that diffusion perpendicular to the c axis is up to 3.5 times slower than along [001], hence we applied this factor to our results, which therefore represent maximum values.

### 2.4 Numerical modeling

Diffusion modeling was performed using the MATLAB script createfit (Petrone et al., 2016). Required inputs are the compositional transect as a \*.csv file (generated by the *greyvalues* script; Fig. S2.2), and  $D$  (as  $\Delta H$  and  $D_0$ ) for the relevant crystal orientation (here: a-axis), temperature (individual for each modelled boundary), and oxygen fugacity (here:  $f_{O_2} = 10^{-9.730}$ ). A non-linear least squares fit to the given compositional profile is iteratively calculated assuming diffusion across a semi-infinite plane sheet (eq. 2.14, Crank, 1979), using

$$y = y_0 + \frac{C_0}{2} \operatorname{erf}\left(\frac{x - x_0}{\sqrt{4Dt}}\right)$$

where  $y$  is the grey value at point  $x$  ( $\mu\text{m}$ ), and  $x_0$  and  $y_0$  are the coordinates of the flex point of the profile. The *createfit* script performs an error propagation for the errors on the fitting parameter  $\sqrt{4Dt}$  and the temperature (Petrone et al., 2016). Depending on data density and the quality of the fit, the error on  $\sqrt{4Dt}$  is typically between 5 and 20 % (1SD; Fig. S2.3). Uncertainties on the temperatures used have a more significant effect on the calculated timescales, typically ranging from 40 – 60% for temperature uncertainties of 15 – 30°C.

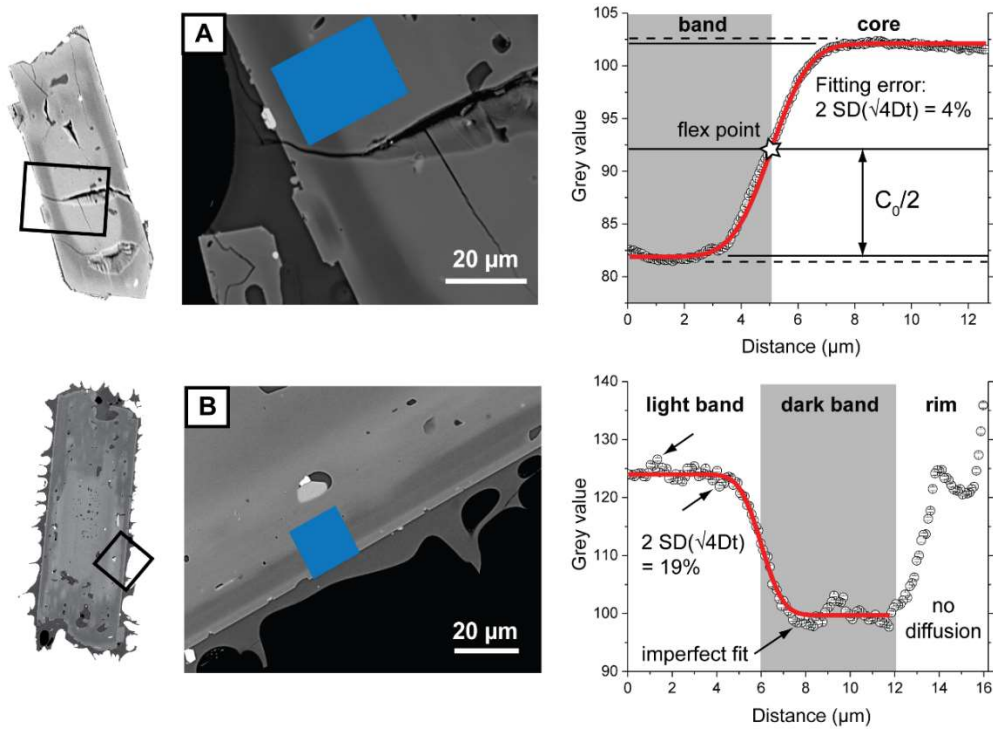

**Figure S2.3.** BSE images of banded orthopyroxene crystals, extracted greyscale profiles and fits modelled using the MATLAB script *createfit* (Petrone et al., 2016). The blue box in BSE images represents the area the compositional transect is integrated from, using the MATLAB script *greyvalues* (Petrone et al., 2016). (A) Crystal showing a core-band transect with a good fit of the diffusion model (red line). (B) Crystal with irregular core-band transition, resulting in an imperfect fit of the diffusion model and larger associated errors.



## Pink Pumice

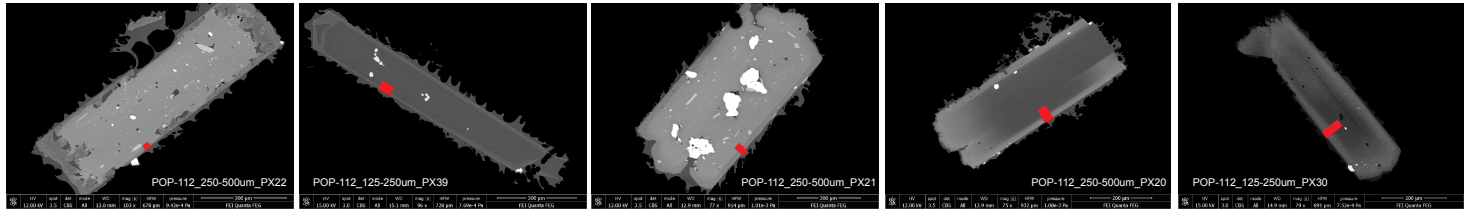

## Nealticán

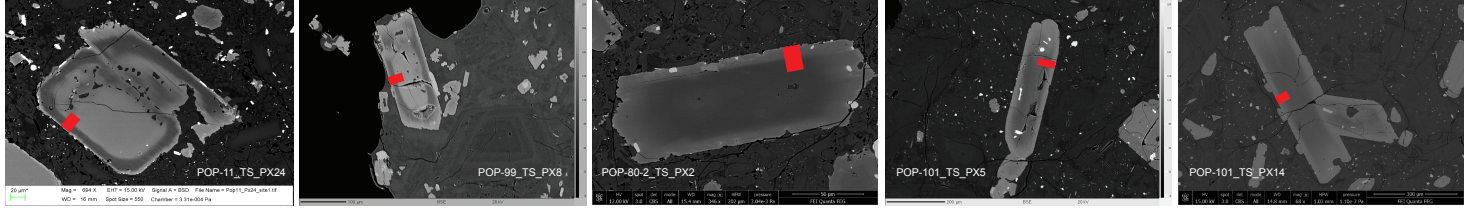

## Yellow Pumice

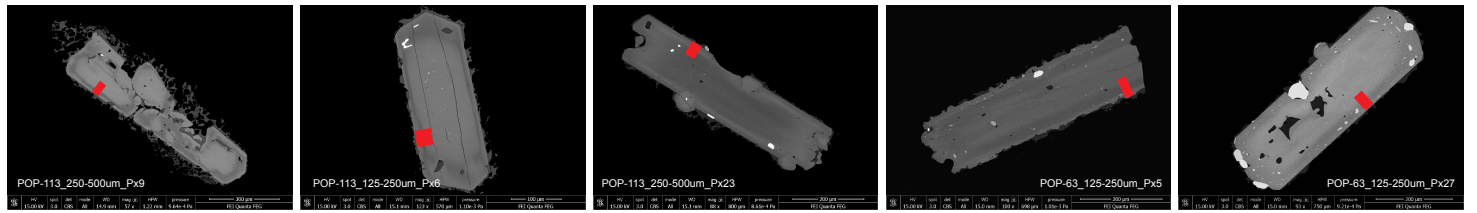

## Pumice with Andesite

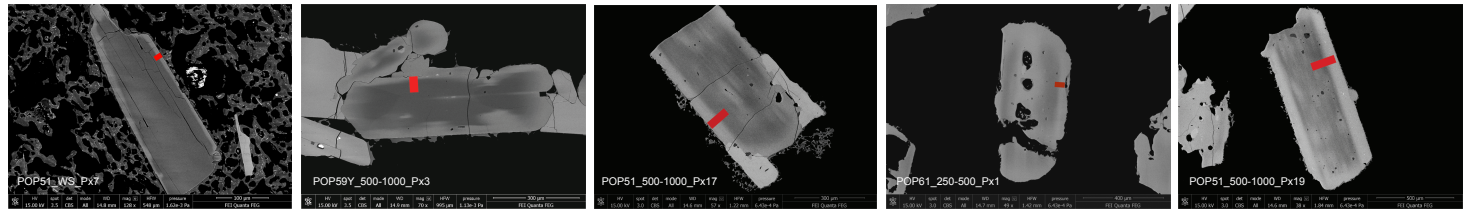

## El Fraile

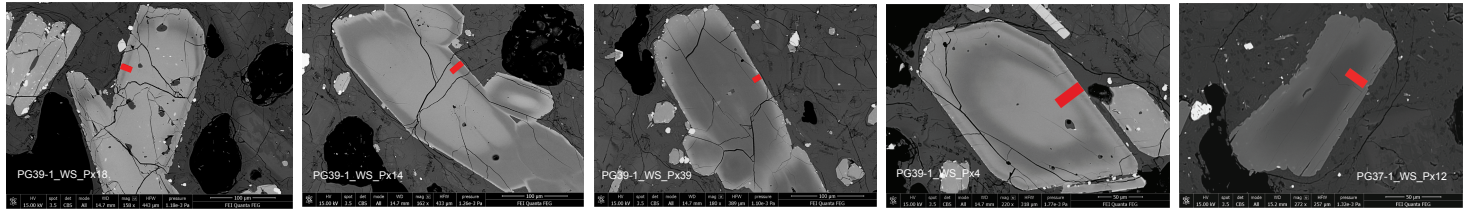

## Tochimilco Pumice

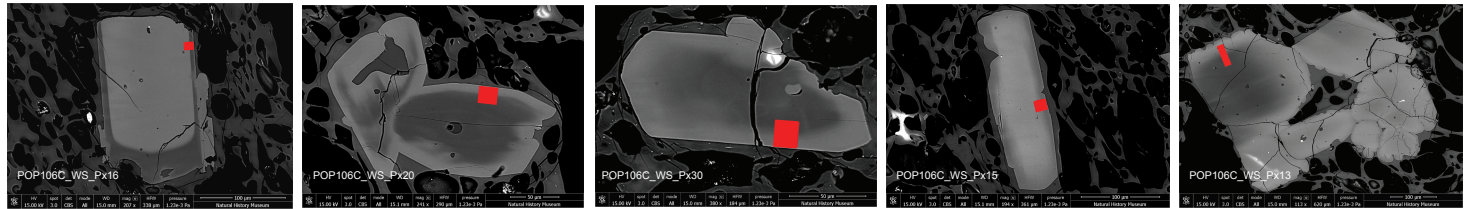

## Ventorrillo

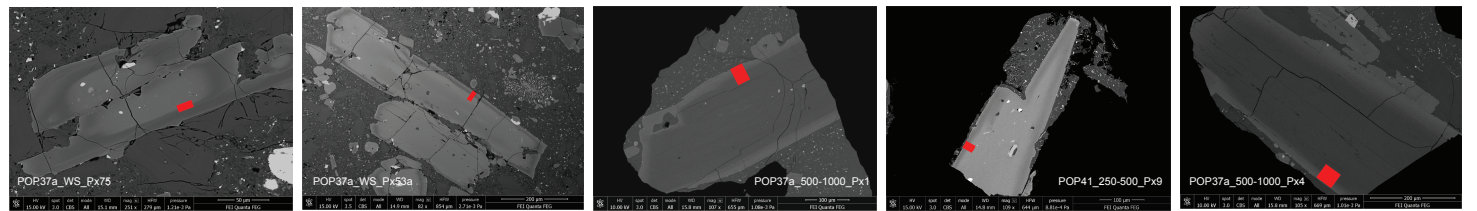

**Fig. S2.4.** Representative BSE images of orthopyroxene crystals selected for diffusion modeling in this study. Red boxes outline where the compositional transects for the models were taken.

**Supplemental Material S3 – Priming durations for eruptions with published  
diffusion data**

***Table S3: Compilation of published diffusion timescales and calculated timescales densities  
to define priming durations. - See separate Excel Sheet.***

- 157 Allan, A. S. R., Morgan, D. J., Wilson, C. J. N., and Millet, M.-A., 2013, From mush to eruption in  
158 centuries: assembly of the super-sized Oruanui magma body: *Contributions to Mineralogy*  
159 *and Petrology*, v. 166, no. 1, p. 143-164, doi: 10.1007/s00410-013-0869-2
- 160 Atlas, Z. D., Dixon, J. E., Sen, G., Finny, M., and Martin-Del Pozzo, A. L., 2006, Melt inclusions  
161 from Volcán Popocatepetl and Volcán de Colima, Mexico: Melt evolution due to vapor-  
162 saturated crystallization during ascent: *Journal of Volcanology and Geothermal Research*, v.  
163 153, no. 3-4, p. 221-240, doi: 10.1016/j.jvolgeores.2005.06.010
- 164 Bacon, C. R., and Hirschmann, M. M., 1988, Mg/Mn partitioning as a test for equilibrium between  
165 coexisting Fe-Ti oxides: *American Mineralogist*, v. 73, no. 1-2, p. 57-61
- 166 Chamberlain, K. J., Morgan, D. J., and Wilson, C. J. N., 2014, Timescales of mixing and mobilisation  
167 in the Bishop Tuff magma body: perspectives from diffusion chronometry: *Contributions to*  
168 *Mineralogy and Petrology*, v. 168, no. 1, doi: 10.1007/s00410-014-1034-2
- 169 Cherniak, D., and Dimanov, A., 2010, Diffusion in pyroxene, mica and amphibole: Reviews in  
170 *Mineralogy and Geochemistry*, v. 72, no. 1, p. 641-690
- 171 Crank, J., 1979, *The mathematics of diffusion*, Oxford university press.
- 172 Dohmen, R., Ter Heege, J. H., Becker, H.-W., and Chakraborty, S., 2016, Fe-Mg interdiffusion in  
173 orthopyroxene: *American Mineralogist*, v. 101, no. 10, p. 2210-2221, doi: 10.2138/am-2016-  
174 5815
- 175 Frost, B. R., 1991, Introduction to oxygen fugacity and its petrologic importance: Reviews in  
176 *Mineralogy and Geochemistry*, v. 25, no. 1, p. 1-9, doi: 10.1515/9781501508684-004
- 177 Ghiorso, M. S., and Evans, B. W., 2008, Thermodynamics of rhombohedral oxide solid solutions and  
178 a revision of the Fe-Ti two-oxide geothermometer and oxygen-barometer: *American Journal*  
179 *of science*, v. 308, no. 9, p. 957-1039, doi: 10.2475/09.2008.01
- 180 Kilgour, G. N., Saunders, K. E., Blundy, J. D., Cashman, K. V., Scott, B. J., and Miller, C. A., 2014,  
181 Timescales of magmatic processes at Ruapehu volcano from diffusion chronometry and their  
182 comparison to monitoring data: *Journal of Volcanology and Geothermal Research*, v. 288, p.  
183 62-75, doi: 10.1016/j.jvolgeores.2014.09.010
- 184 Krimer, D., and Costa, F., 2017, Evaluation of the effects of 3d diffusion, crystal geometry, and initial  
185 conditions on retrieved time-scales from Fe-Mg zoning in natural oriented orthopyroxene  
186 crystals: *Geochimica et Cosmochimica Acta*, v. 196, p. 271-288, doi:  
187 10.1016/j.gca.2016.09.037
- 188 Morgan, D. J., Blake, S., Rogers, N. W., DeVivo, B., Rolandi, G., Macdonald, R., and Hawkesworth,  
189 C. J., 2004, Time scales of crystal residence and magma chamber volume from modelling of  
190 diffusion profiles in phenocrysts: Vesuvius 1944: *Earth and Planetary Science Letters*, v. 222,  
191 no. 3-4, p. 933-946, doi: 10.1016/j.epsl.2004.03.030
- 192 Petrone, C. M., Bugatti, G., Braschi, E., and Tommasini, S., 2016, Pre-eruptive magmatic processes  
193 re-timed using a non-isothermal approach to magma chamber dynamics: *Nature*  
194 *communications*, v. 7, no. 12946, doi: 10.1038/ncomms12946
